# Supplementary material for: Selection and evaluation of an efficient method for the recovery of viral nucleic acids from complex biologicals
Source: PubMed Central journal article supplement (PMC6086827; doi:10.1038/s41541-018-0067-3), 2018-08-10
Supplement: 41541_2018_67_MOESM1_ESM.pdf [file 41541_2018_67_MOESM1_ESM.pdf]

### Supplementary Information - Table 1: Viruses Used and Their Associated Characteristics

4 viruses were selected to represent different biophysical and biochemical properties.

| Virus                       | Strain  | Nucleic Acid                          | Size of Genome (Kb) (accession number) | Enveloped |
|-----------------------------|---------|---------------------------------------|----------------------------------------|-----------|
| Epstein-Barr Virus          | B95-8   | Double-stranded DNA                   | 172.3 (V01555.2)                       | Yes       |
| Feline Leukemia Virus       | Thielen | Single-stranded RNA (+ve; retrovirus) | 8.2 (NC_001940.1)                      | Yes       |
| Respiratory Syncytial Virus | A2      | Single-stranded RNA (-ve)             | 15.2 (KF826849.1)                      | Yes       |
| Reovirus 3                  | Dearing | Double-stranded RNA                   | 23 - in 10 segments (GCF_000924305.1)  | No        |

## Supplementary Information - Table 2: Extraction Approaches Evaluated

11 extraction approaches were evaluated for unbiased extraction of viral nucleic acid extraction.

A rationale is provided for their inclusion in this study.

| Supplier                                      | Kit Name                               | Chemistry            | Rationale for Inclusion in Study                                                                   |
|-----------------------------------------------|----------------------------------------|----------------------|----------------------------------------------------------------------------------------------------|
| QIAGEN<br>(Toronto, Canada)                   | QIAamp®<br>MinElute® Virus<br>Spin Kit | Silica               | Typically used sample<br>preparation method                                                        |
| QIAGEN<br>(Toronto, Canada)                   | QIAamp®<br>Circulating Nucleic<br>Acid | Silica               | Up to 5 mL starting volume                                                                         |
| QIAGEN<br>(Toronto, Canada)                   | RNeasy® Mini Kit                       | Silica               | RNA extraction                                                                                     |
| ClonTech Laboratories<br>(Mountain View, USA) | NucleoBond®<br>RNA/DNA                 | Silica               | DNA and RNA separately<br>eluted                                                                   |
| ClonTech Laboratories<br>(Mountain View, USA) | NucleoSpin® RNA<br>Virus F             | Silica               | 1 mL starting volume                                                                               |
| Life Technologies<br>(Carlsbad, USA)          | PureLink™ Viral<br>RNA/DNA Mini Kit    | Silica               | Lysis buffer is optimized for<br>the lysis of viruses                                              |
| Life Technologies<br>(Carlsbad, USA)          | Dynabeads®<br>SILANE Viral NA<br>Kit   | Silica like<br>beads | Not Silica; No membrane<br>clogging by cell debris                                                 |
| Wako Chemicals<br>(Richmond, USA)             | DNA Extractor®                         | Precipitation        | DNA extraction                                                                                     |
| Perkin Elmer<br>(Waltham, USA)                | Chemagic™ Viral<br>DNA/RNA kit         | Silica beads         | No membrane clogging by<br>cell debris                                                             |
| Life Technologies<br>(Carlsbad, USA)          | Phenol-Chloroform                      | Organic<br>solvent   | Potentially cleaner of salts<br>and cell components; Large<br>starting volume (Isolate<br>DNA/RNA) |
| Life Technologies<br>(Carlsbad, USA)          | Acid Phenol-<br>Chloroform (pH 5)      | Organic<br>solvent   | Potentially cleaner of salts<br>and cell components; Large<br>starting volume (Isolate<br>RNA)     |

**Supplementary Information – Table 3: Sequencing results for the MinElute + WGA and Optimized Procedure replicates**

Reads Per Kilobase Million (RPKM) is an indication of the bias observed between the different virus types (reported below in Parentheses). In the MinElute+WGA procedure, there is a large difference between the recovery of EBV and RSV / Reo3 even after normalizing for genome size. In our optimized procedure, the recovery of all viral types is more balanced with enhancement for Reo3 and RSV.

| Virus                            | MinElute + WGA                   |                                   |                                   |
|----------------------------------|----------------------------------|-----------------------------------|-----------------------------------|
|                                  | Replicate #1                     | Replicate #2                      | Replicate #3                      |
| Total Number of sequencing Reads | 217113184                        | 217740212                         | 303618486                         |
| EBV (172Kb)                      | 1266738<br>(33.6)                | 566528<br>(15.1)                  | 758085<br>(14.5)                  |
| RSV (8.2Kb)                      | 510<br>( $5.07 \times 10^{-4}$ ) | 3308<br>( $7.38 \times 10^{-3}$ ) | 5316<br>( $1.23 \times 10^{-2}$ ) |
| FeLV (15.2Kb)                    | 994<br>(66.0)                    | 5572<br>(25.4)                    | 11322<br>(30.9)                   |
| Reo3 (23Kb)                      | 2<br>( $1.02 \times 10^{-6}$ )   | 90<br>( $1.19 \times 10^{-4}$ )   | 283<br>( $3.09 \times 10^{-4}$ )  |

| Virus                            | Optimized Procedure |                   |                   |                    |
|----------------------------------|---------------------|-------------------|-------------------|--------------------|
|                                  | Replicate #1        | Replicate #2      | Replicate #3      | Replicate #4       |
| Total Number of sequencing Reads | 239327708           | 306409538         | 173469346         | 283646346          |
| EBV (172Kb)                      | 1049436<br>(25.4)   | 1043475<br>(19.8) | 312890<br>(10.5)  | 1154295<br>(23.6)  |
| RSV (8.2Kb)                      | 22579<br>(11.5)     | 30172<br>(12.0)   | 8575<br>(6.0)     | 17780<br>(7.6)     |
| FeLV (15.2Kb)                    | 71024<br>(19.5)     | 137028<br>(29.4)  | 75032<br>(28.5)   | 75388<br>(17.5)    |
| Reo3 (23Kb)                      | 752834<br>(136.7)   | 580200<br>(82.3)  | 783999<br>(196.5) | 1576400<br>(241.6) |

**Supplementary Information – Table 4: Extraction Approaches Tested and Modifications to the Manufacturer’s Protocol**

|                                     |                                                                                                                                                                                                                                                                                                                                                                                                                                                                                                                                                                                                                                                                                                                                        |
|-------------------------------------|----------------------------------------------------------------------------------------------------------------------------------------------------------------------------------------------------------------------------------------------------------------------------------------------------------------------------------------------------------------------------------------------------------------------------------------------------------------------------------------------------------------------------------------------------------------------------------------------------------------------------------------------------------------------------------------------------------------------------------------|
| PureLink™ Viral RNA/DNA             | Starting volume: 200 µL. Final spin to completely dry the column and the elution of the nucleic acid was carried out at 16 100 × g for 1 min.                                                                                                                                                                                                                                                                                                                                                                                                                                                                                                                                                                                          |
| QIAamp® MinElute® Virus Spin        | Starting volume: 200 µL. Intermediate spins were carried out at 6800 × g. The columns were dried for 3 min at room temperature (rt). The final elution volume was incubated on the column at rt for 5 min and elution was at 16 100 × g                                                                                                                                                                                                                                                                                                                                                                                                                                                                                                |
| Dynabeads® SILANE Viral NA          | Starting volume: 200 µL. Magnetic beads were dried for 15 min on the magnetic stand, then removed from the stand and dried for a further 5 min.                                                                                                                                                                                                                                                                                                                                                                                                                                                                                                                                                                                        |
| QIAamp® Circulating Nucleic Acid    | Starting volume: 3 mL. The protocol for 3 mL of sample was followed. Columns were dried at rt for 10 min and the final elution was at 16 100 × g.                                                                                                                                                                                                                                                                                                                                                                                                                                                                                                                                                                                      |
| Chemagic™ Viral DNA/RNA             | Starting volume: 200 µL. Elution was carried out with intermediate agitation.                                                                                                                                                                                                                                                                                                                                                                                                                                                                                                                                                                                                                                                          |
| RNeasy® Mini                        | Starting volume: 100 µL. Sample supernatant was combined with 15 µL of Proteinase K and incubated at rt for 10 min to digest the viral capsid. An on-column DNase digest was carried out. The second RWI wash was incubated on the column for 5 min at rt and the 2 final spins were conducted at 16 100 × g. The final elution volume was 50 µL.                                                                                                                                                                                                                                                                                                                                                                                      |
| Wako DNA Extractor®                 | Scheme 1 of the manufacturer’s protocol was followed with the following modifications: Sample was combined with 20 µL Proteinase K and 0.84 µL of RNase A and incubated at 60°C for 20 min. DNA pellet was first washed with 1 mL of Wash Solution A, followed by a second wash with 1 mL of Wash Solution B with 0.5 µL of the glycogen solution. The final pellet was air-dried for 5 min and dissolved in water.                                                                                                                                                                                                                                                                                                                    |
| NucleoSpin® RNA Virus F             | Starting volume: 1 mL. 133 µL of Proteinase K was combined with 4 mL of RAV1. To remove residual Buffer RAV3, the column was placed in a clean collection tube and spun at 3000 × g for an additional 10 min. Final elution volume was with 50 µL of water pre-heated to 70°C.                                                                                                                                                                                                                                                                                                                                                                                                                                                         |
| NucleoBond® RNA/DNA 80              | Starting volume: 100 µL. Sample was combined with 25 µL of Proteinase K and 500 µL of Buffer W1 and incubated at 60°C for 15 min. Flow through was collected after each wash with Buffer R1, Buffer R1:R2, Buffer R2. Precipitated nucleic acid was pelleted by centrifugation at 3148 × g. Final pellet was resuspended in water.                                                                                                                                                                                                                                                                                                                                                                                                     |
| (Acid) Phenol:Chloroform Extraction | An in-house protocol was employed. 100 µL of sample supernatant was combined with 25 µL of Proteinase K and 200 µL of the lysis buffer (from the PureLink™ Viral RNA/DNA kit) and incubated at 56°C for 15 min. 300 µL of (Acid) Phenol:Chloroform was added and vortexed for 1 min. Sample was centrifuged for 5 min at rt at 16 100 × g. Aqueous phase was combined with 2-2.5 × volume of ice-cold ethanol. Mixture was incubated at -20°C overnight and centrifuged for 30 min at 20 000 × g at 4°C. Pellet was washed with cold 80% ethanol and centrifuged for 15 min at 20 000 × g at 4°C. Supernatant was removed and pellet was dried for 15 min at rt. Final pellet was dissolved in water and incubated at 50°C for 10 min. |

**Supplementary Information – Table 5: Virus-Specific Primers**

Virus-specific primers used for qPCR assessment of virus recovery.

| Virus | Gene   | Accession # | Primer Sequence 5'→3'                           |
|-------|--------|-------------|-------------------------------------------------|
| EBV   | EBNA-1 | NC_007605.1 | AGCGTTTCTTGAGCTTCCCT<br>TGATGCGACGATCACAGGTC    |
| EBV   | EBNA-1 | NC_007605.1 | CTGGGATGAGCGTTTGG<br>CTGGCGGTCTATGATGC          |
| EBV   | EBNA-1 | NC_007605.1 | CAGCCCAGAGAGTAGTCTCAG<br>GTGAATCTGCTCCCAGGTCT   |
| FeLV  | LTR    | NC_001940.1 | CCCGTGTACGAATAAACCTC<br>CCCTGAACTAGGTCTTCCT     |
| FeLV  | LTR    | NC_001940.1 | TACCAGCAGTCTCCAGGCT<br>ACAGAAGCGAGAGGCGTG       |
| RSV   | N      | KJ627707.1  | CAGGGCAAGTGATGTTACG<br>CATAAACTTCCACAACCTTGTTCC |
| RSV   | N      | KJ627707.1  | TGCAGGATTGTTTATGAATGC<br>CCATTTCTGCTTGCACACTA   |
| Reo3  | M3     | AF174384.1  | CCTATCTACTAGAGTGTCTACCC<br>ATCCTGGAGGCTCATACC   |
| Reo3  | M3     | AF174384.1  | AGGCTACAGATGGAGTTGAGT<br>ATGCAAGTGTGGTGTCTCAG   |
